# Supplementary material for: Line-Up Image Position in Simultaneous and Sequential Line-Ups: The Effects of Age and Viewing Distance on Selection Patterns
Source: Front Psychol. 2020 Jul 1;11:1349. doi: 10.3389/fpsyg.2020.01349 (PMC7342269; doi:10.3389/fpsyg.2020.01349)
Supplement: Supplementary file 2 [file Data_Sheet_2.XLSX]

## Sheet: For manuscript
	Simultaneous Target Present Line-ups (6-11-year-olds)																						Sequential Target Present Line-ups (6-11-year-olds)
	Distance (meters)	Total Decisions																					Distance (meters)	Total Decisions
			Target Selections (T)	Filler Selections(F)	Rejections (R)	Position 1		Position 2		Position 3		Position 4		Position 5		Position 6		Position 7		Position 8					Target Selections (T)	Filler Selections(F)	Rejections (R)	Position 1		Position 2		Position 3		Position 4		Position 5		Position 6		Position 7		Position 8
						T	F	T	F	T	F	T	F	T	F	T	F	T	F	T	F							T	F	T	F	T	F	T	F	T	F	T	F	T	F	T	F
	5-20	75	34	21	20	1	6	7	1	3	1	5	1	4	2	5	5	3	3	6	2		5-20	68	18	20	30	1	10	4	2	2	2	2	1	0	1	4	1	5	1	0	2
	25-40	68	14	26	28	2	6	3	3	0	1	2	2	3	4	1	5	2	2	1	3		25-40	66	8	29	29	2	11	2	3	1	3	0	2	0	5	1	1	2	2	0	2
	45-70	73	14	27	32	2	3	3	1	2	2	1	7	1	5	2	1	0	4	3	4		45-70	61	10	29	22	4	10	1	5	0	4	0	4	1	2	2	2	1	2	1	0
	80-110	62	2	40	20	1	6	0	7	1	3	0	3	0	4	0	5	0	8	0	4		80-110	69	6	41	22	2	22	0	5	0	3	0	1	2	4	1	4	1	0	0	2
	Total	278	64	114	100	6	21	13	12	6	7	8	13	8	15	8	16	5	17	10	13		Total	264	42	119	103	9	53	7	15	3	12	2	8	3	12	8	8	9	5	1	6
																									161
	Simultaneous Target Absent Line-ups (6-11-year-olds)																						Sequential Target Absent Line-ups (6-11-year-olds)
	Distance (meters)	Total Decisions																					Distance (meters)	Total Decisions
					Rejections (R)	P1	P2	P3	P4	P5	P6	P7	P8														Rejections (R)	P1	P2	P3	P4	P5	P6	P7	P8
				Filler (F)		F	F	F	F	F	F	F	F													Filler (F)		F	F	F	F	F	F	F	F
	5-20	58		27	31	3	5	3	2	2	4	6	2										5-20	58		28	30	9	5	2	4	2	1	2	3
	25-40	63		40	23	6	7	5	4	4	4	6	4										25-40	62		32	30	18	4	3	0	2	4	0	1
	45-70	62		38	24	2	7	2	2	6	3	8	8										45-70	66		34	32	13	4	5	2	4	1	1	4
	80-110	72		46	26	5	4	6	3	9	6	6	7										80-110	55		41	14	14	2	9	5	3	1	6	1
	Total	255		151	104	19	18	12	15	17	18	24	21										Total	241		135	106	54	15	19	11	11	7	9	9
	Simultaneous Target Present Line-ups (12-17-year-olds)																						Sequential Target Present Line-ups (12-17-year-olds)
	Distance (meters)	Total Decisions																					Distance (meters)	Total Decisions
			Target Selections (T)	Filler Selections(F)	Rejections (R)	Position 1		Position 2		Position 3		Position 4		Position 5		Position 6		Position 7		Position 8					Target Selections (T)	Filler Selections(F)	Rejections (R)	Position 1		Position 2		Position 3		Position 4		Position 5		Position 6		Position 7		Position 8
						T	F	T	F	T	F	T	F	T	F	T	F	T	F	T	F							T	F	T	F	T	F	T	F	T	F	T	F	T	F	T	F
	5-20	92	45	21	26	2	0	8	4	8	3	5	2	2	3	7	2	7	1	6	6		5-20	69	30	17	22	2	3	4	5	6	1	0	0	5	2	4	2	4	2	5	2
	25-40	86	32	23	31	6	3	1	3	6	2	6	4	3	1	2	1	0	3	8	6		25-40	75	13	38	24	4	11	2	5	3	3	2	4	1	2	0	6	0	3	1	4
	45-70	82	19	33	30	2	3	2	4	5	6	3	4	0	6	2	5	3	1	2	4		45-70	59	8	34	17	1	11	1	3	1	5	0	4	1	3	1	1	2	3	1	4
	80-110	81	20	41	20	1	6	3	3	1	4	4	11	4	4	2	5	1	3	4	5		80-110	68	17	36	15	7	14	3	4	2	6	0	2	2	3	0	2	2	4	1	1
	Total	341	116	118	107	11	12	14	14	20	15	18	21	9	14	13	13	11	8	20	21		Total	271	68	125	78	14	39	10	17	12	15	2	10	9	10	5	11	8	12	8	11
																									193
	Simultaneous Target Absent Line-ups (12-17-year-olds)																						Sequential Target Absent Line-ups (12-17-year-olds)
	Distance (meters)	Total Decisions																					Distance (meters)	Total Decisions
					Rejections (R)	P1	P2	P3	P4	P5	P6	P7	P8														Rejections (R)	P1	P2	P3	P4	P5	P6	P7	P8
				Filler (F)		F	F	F	F	F	F	F	F													Filler (F)		F	F	F	F	F	F	F	F
	5-20	66		30	36	2	5	3	5	5	2	5	3										5-20	74		26	48	5	8	1	6	2	0	3	1
	25-40	73		43	30	5	3	7	5	10	4	4	5										25-40	67		36	31	11	3	2	4	4	4	5	3
	45-70	74		45	29	8	7	3	4	7	8	5	3										45-70	87		50	37	12	5	5	5	5	3	10	5
	80-110	77		63	14	5	9	11	10	6	9	9	4										80-110	75		53	22	21	4	7	5	6	4	4	2
	Total	290		181	109	20	24	24	24	28	23	23	15										Total	303		165	138	49	20	15	20	17	11	22	11
	Simultaneous Target Present Line-ups (18-44-year-olds)																						Sequential Target Present Line-ups (18-44-year-olds)
	Distance (meters)	Total Decisions																					Distance (meters)	Total Decisions
			Target Selections (T)	Filler Selections(F)	Rejections (R)	Position 1		Position 2		Position 3		Position 4		Position 5		Position 6		Position 7		Position 8					Target Selections (T)	Filler Selections(F)	Rejections (R)	Position 1		Position 2		Position 3		Position 4		Position 5		Position 6		Position 7		Position 8
						T	F	T	F	T	F	T	F	T	F	T	F	T	F	T	F							T	F	T	F	T	F	T	F	T	F	T	F	T	F	T	F
	5-20	169	102	31	36	13	4	14	4	11	4	18	5	11	3	8	5	17	1	10	5		5-20	154	64	36	54	9	9	9	2	8	6	10	6	9	2	8	2	7	4	4	5
	25-40	163	57	60	46	15	6	7	12	8	10	5	11	6	6	4	6	3	6	9	3		25-40	160	45	44	71	8	13	6	6	6	6	5	6	6	3	5	4	2	4	7	2
	45-70	154	32	80	42	5	14	2	13	5	11	2	12	2	9	7	6	3	8	6	7		45-70	177	32	85	60	5	23	5	14	2	10	4	9	3	9	4	5	6	6	3	9
	80-110	173	25	91	57	0	17	4	15	5	8	2	11	6	11	1	13	4	10	3	6		80-110	186	24	97	65	4	31	1	18	4	11	3	8	1	10	5	7	4	8	2	4
	Total	659	216	262	181	33	41	27	44	29	33	27	39	25	29	20	30	27	25	28	21		Total	677	165	262	250	26	76	21	40	20	33	22	29	19	24	22	18	19	22	16	20
																									427
	Simultaneous Target Absent Line-ups (18-44-year-olds)																						Sequential Target Absent Line-ups (18-44-year-olds)
	Distance (meters)	Total Decisions																					Distance (meters)	Total Decisions
					Rejections (R)	P1	P2	P3	P4	P5	P6	P7	P8														Rejections (R)	P1	P2	P3	P4	P5	P6	P7	P8
				Filler (F)		F	F	F	F	F	F	F	F													Filler (F)		F	F	F	F	F	F	F	F
	5-20	168		67	101	12	10	6	8	6	7	9	9										5-20	189		67	122	8	4	10	9	10	6	10	10
	25-40	174		89	85	12	9	12	13	15	9	14	5										25-40	189		95	94	17	15	10	9	13	10	17	4
	45-70	183		113	70	13	20	9	14	12	19	12	14										45-70	167		101	66	27	9	12	13	11	9	13	7
	80-110	162		103	59	17	11	12	10	18	11	13	11										80-110	158		109	49	24	22	12	11	14	12	6	8
	Total	687		372	315	54	50	39	45	51	46	48	39										Total	703		372	331	76	50	44	42	48	37	46	29
	Simultaneous Target Present Line-ups (45-59-year-olds)																						Sequential Target Present Line-ups (45-59-year-olds)
	Distance (meters)	Total Decisions																					Distance (meters)	Total Decisions
			Target Selections (T)	Filler Selections(F)	Rejections (R)	Position 1		Position 2		Position 3		Position 4		Position 5		Position 6		Position 7		Position 8					Target Selections (T)	Filler Selections(F)	Rejections (R)	Position 1		Position 2		Position 3		Position 4		Position 5		Position 6		Position 7		Position 8
						T	F	T	F	T	F	T	F	T	F	T	F	T	F	T	F							T	F	T	F	T	F	T	F	T	F	T	F	T	F	T	F
	5-20	49	28	14	7	6	3	5	2	0	0	3	3	2	0	4	5	6	1	2	0		5-20	68	33	15	20	3	2	5	2	6	0	7	2	4	2	1	3	4	4	3	0
	25-40	50	13	16	21	1	2	2	1	0	1	1	2	4	1	1	2	0	3	4	4		25-40	55	10	26	19	0	4	2	2	2	3	2	5	0	4	1	2	2	4	1	2
	45-70	55	11	22	22	1	1	1	5	0	2	2	3	1	3	2	2	2	4	2	2		45-70	56	7	30	19	1	8	0	10	2	5	1	1	0	0	0	2	3	2	0	2
	80-110	54	8	29	17	2	2	0	2	0	6	0	1	3	6	2	3	0	6	1	3		80-110	55	3	38	14	0	12	2	9	0	3	0	2	0	4	0	4	0	2	1	2
	Total	208	60	81	67	10	8	8	10	0	9	6	9	10	10	9	12	8	14	9	9		Total	234	53	109	72	4	26	9	23	10	11	10	10	4	10	2	11	9	12	5	6
																									162
	Simultaneous Target Absent Line-ups (45-59-year-olds)																						Sequential Target Absent Line-ups (45-59-year-olds)
	Distance (meters)	Total Decisions																					Distance (meters)	Total Decisions
					Rejections (R)	P1	P2	P3	P4	P5	P6	P7	P8														Rejections (R)	P1	P2	P3	P4	P5	P6	P7	P8
				Filler (F)		F	F	F	F	F	F	F	F													Filler (F)		F	F	F	F	F	F	F	F
	5-20	53		36	17	7	4	4	6	3	6	3	3										5-20	50		24	26	2	5	5	1	5	3	1	2
	25-40	55		39	16	7	4	6	4	3	1	6	8										25-40	63		35	28	8	4	5	6	4	2	5	1
	45-70	49		37	12	3	7	4	5	1	5	5	7										45-70	64		46	18	12	7	7	6	8	2	3	1
	80-110	50		35	15	5	1	7	3	7	5	5	2										80-110	65		44	21	9	4	5	10	3	4	4	5
	Total	207		147	60	22	16	21	18	14	17	19	20										Total	242		149	93	31	20	22	23	20	11	13	9
	Simultaneous Target Present Line-ups (60-77-year-olds)																						Sequential Target Present Line-ups (60-77-year-olds)
	Distance (meters)	Total Decisions																					Distance (meters)	Total Decisions
			Target Selections (T)	Filler Selections(F)	Rejections (R)	Position 1		Position 2		Position 3		Position 4		Position 5		Position 6		Position 7		Position 8					Target Selections (T)	Filler Selections(F)	Rejections (R)	Position 1		Position 2		Position 3		Position 4		Position 5		Position 6		Position 7		Position 8
						T	F	T	F	T	F	T	F	T	F	T	F	T	F	T	F							T	F	T	F	T	F	T	F	T	F	T	F	T	F	T	F
	5-20	19	11	5	3	2	2	2	1	0	1	2	1	1	0	4	0	0	0	0	0		5-20	25	8	10	7	1	2	1	3	0	2	1	2	1	1	0	0	2	0	2	0
	25-40	26	4	7	15	1	2	1	1	0	1	1	1	0	0	0	0	1	2	0	0		25-40	27	7	13	7	2	7	1	2	2	2	1	0	0	2	0	0	0	0	1	0
	45-70	16	3	8	5	1	2	0	1	1	0	0	1	1	0	0	2	0	1	0	1		45-70	19	3	11	5	0	2	0	2	0	3	1	1	1	0	0	0	0	2	1	1
	80-110	22	0	9	13	0	0	0	1	0	2	0	4	0	0	0	0	0	1	0	1		80-110	23	3	13	7	1	4	0	2	2	0	0	1	0	0	0	2	0	2	0	2
	Total	83	18	29	36	4	6	3	4	1	4	3	7	2	0	4	2	1	4	0	2		Total	94	21	47	26	4	15	2	9	4	7	3	4	2	3	0	2	2	4	4	3
																									68
	Simultaneous Target Absent Line-ups (60-77-year-olds)																						Sequential Target Absent Line-ups (60-77-year-olds)
	Distance (meters)	Total Decisions																					Distance (meters)	Total Decisions
					Rejections (R)	P1	P2	P3	P4	P5	P6	P7	P8														Rejections (R)	P1	P2	P3	P4	P5	P6	P7	P8
				Filler (F)		F	F	F	F	F	F	F	F													Filler (F)		F	F	F	F	F	F	F	F
	5-20	25		16	9	2	4	0	4	1	1	2	2										5-20	24		11	13	4	1	2	0	0	3	1	0
	25-40	18		12	6	1	2	1	4	0	1	1	2										25-40	24		21	3	5	3	3	1	5	1	2	1
	45-70	27		16	11	2	2	3	2	3	1	1	2										45-70	30		23	7	8	3	4	4	1	1	0	2
	80-110	22		12	10	0	2	2	0	2	4	1	1										80-110	26		15	11	5	0	4	2	1	2	1	0
	Total	92		56	36	5	10	6	10	6	7	5	7										Total	104		70	34	22	7	13	7	7	7	4	3
